# Supplementary material for: Pathomic Features Reveal Immune and Molecular Evolution From Lung Preneoplasia to Invasive Adenocarcinoma
Source: PubMed Central journal article supplement — Mod Pathol. Author manuscript; Available in PMC 2024 Feb 5. (PMC10841057; doi:10.1016/j.modpat.2023.100326), 2023-09-09
Supplement: NIHMS1932825-supplement-supplement_files.pdf [file NIHMS1932825-supplement-supplement_files.pdf]

## Supplementary Materials of Pathomic Features Reveal Immune and Molecular Evolution from Lung Preneoplasia to Invasive Adenocarcinoma

### Supplementary Tables

**Supp Table 1.** Statistics of patients, slides, and regions of interest (ROI) within the Japan, China, and USA cohorts belonging to distinct pathological stages (Normal, AAH, AIS, MIA, and ADC).

| Entity | Patient (n=98) |       |     | Slide (n=162) |       |     | ROI (n=669) |       |     |
|--------|----------------|-------|-----|---------------|-------|-----|-------------|-------|-----|
|        | Japan          | China | USA | Japan         | China | USA | Japan       | China | USA |
| Cohort |                |       |     |               |       |     |             |       |     |
| Stages |                |       |     |               |       |     |             |       |     |
| Normal | 0              | 0     | 0   | 0             | 0     | 9   | 66          | 16    | 61  |
| AAH    | 6              | 2     | 1   | 22            | 3     | 17  | 47          | 12    | 70  |
| AIS    | 12             | 3     | 1   | 22            | 5     | 1   | 69          | 15    | 10  |
| MIA    | 21             | 2     | 3   | 22            | 4     | 3   | 67          | 10    | 21  |
| ADC    | 20             | 14    | 13  | 20            | 18    | 16  | 86          | 63    | 56  |
| Total  | 59             | 21    | 18  | 86            | 30    | 46  | 335         | 116   | 218 |

Note: Normal ROIs within Japan and China cohorts were annotated from slides diagnosed with severe pathological stages, such as AAH and AIS.

**Supp Table 2.** The numbers of slides and annotated regions of interest (ROI) with different diagnosis in each pathological stage in three study cohorts.

| Slides No.  | Normal-ROIs | AAH-ROIs | AIS-ROIs | MIA-ROIs | ADC-ROIs |
|-------------|-------------|----------|----------|----------|----------|
| Normal (9)  | 45          | 0        | 0        | 0        | 0        |
| AAH (42)    | 77          | 125      | 0        | 0        | 0        |
| AIS (28)    | 21          | 0        | 94       | 0        | 0        |
| MIA (29)    | 0           | 0        | 0        | 98       | 0        |
| ADC (54)    | 0           | 4        | 0        | 0        | 205      |
| Total (162) | 143         | 129      | 94       | 98       | 205      |

**Supp Table 3.** Extracted nine pathomic features and their descriptions.

| Pathomic Features | Description                                                                                     |
|-------------------|-------------------------------------------------------------------------------------------------|
| AEC-Proportion    | AEC cell number divided by the total number of cells within an ROI                              |
| LYM-Proportion    | LYM cell number divided by the total number of cells within an ROI                              |
| AEC-Density       | AEC cell number divided by the ROI area ( $\mu\text{m}^2$ )                                     |
| LYM-Density       | LYM cell number divided by the ROI area ( $\mu\text{m}^2$ )                                     |
| Altieri-Entropy   | spatial mutual information and spatial residual entropy among all 3 cell subtypes within an ROI |
| AEC-Contrast      | the contrast property of ROI embedded AEC-map's GLCM                                            |
| AEC-Energy        | the energy property of ROI embedded AEC-map's GLCM                                              |
| LYM-Contrast      | the contrast property of ROI embedded LYM-map's GLCM                                            |
| LYM-Energy        | the energy property of ROI embedded LYM-map's GLCM                                              |

**Supplementary Figures**

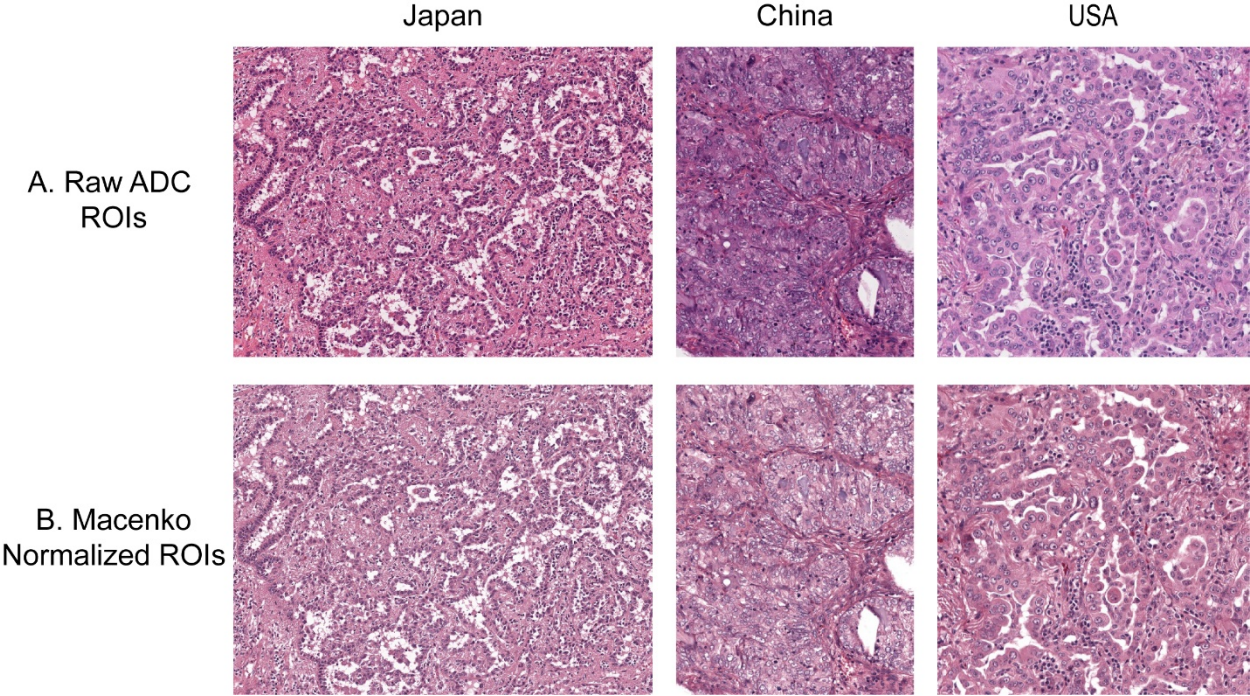

Japan

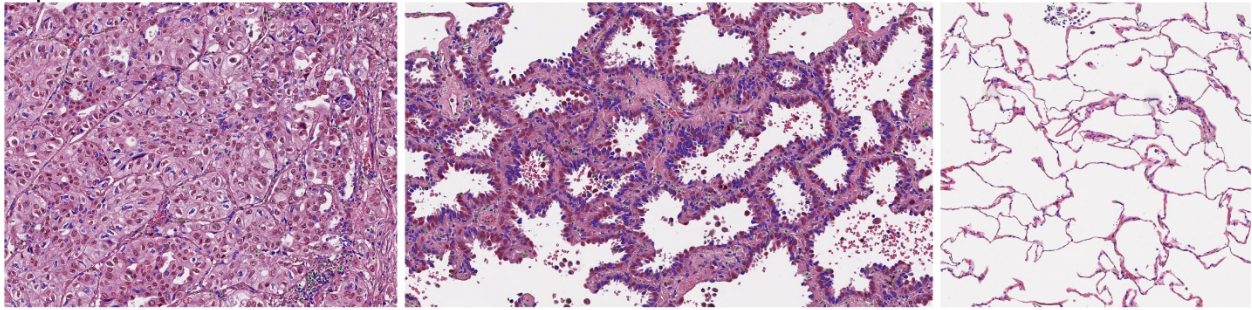

China

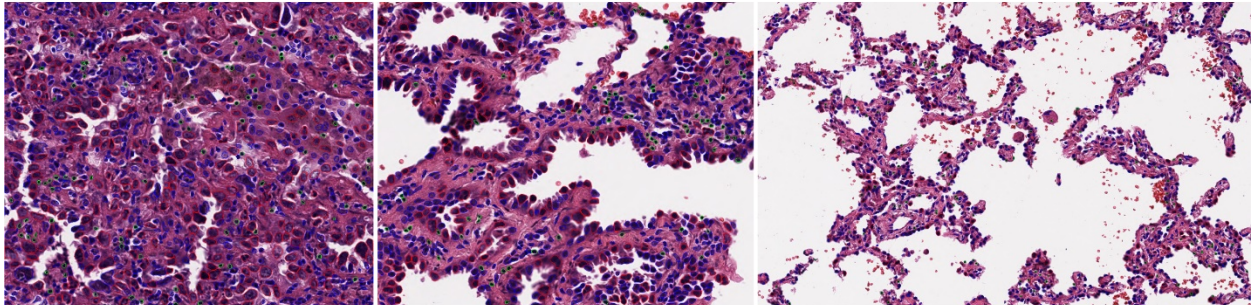

USA

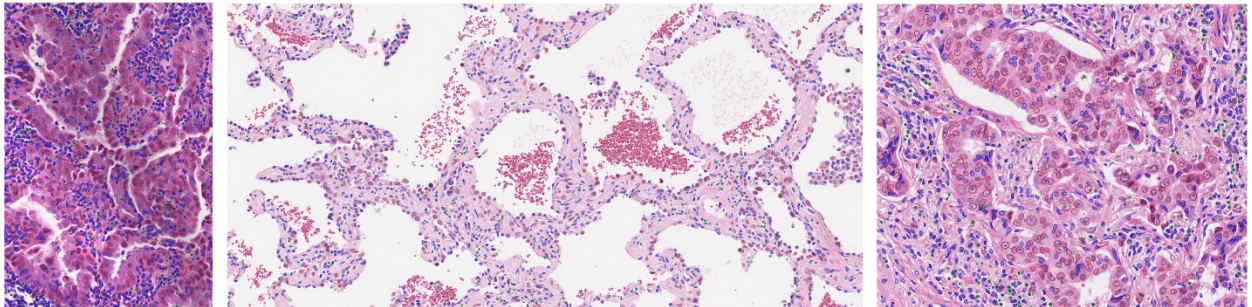

**Supp Figure 2.** Exemplary HoVer-Net segmented nuclei overlaying regions of interest (ROI). ROIs are randomly selected from three cohorts (Japan, China, and USA), and the nuclei contour are overlaid.

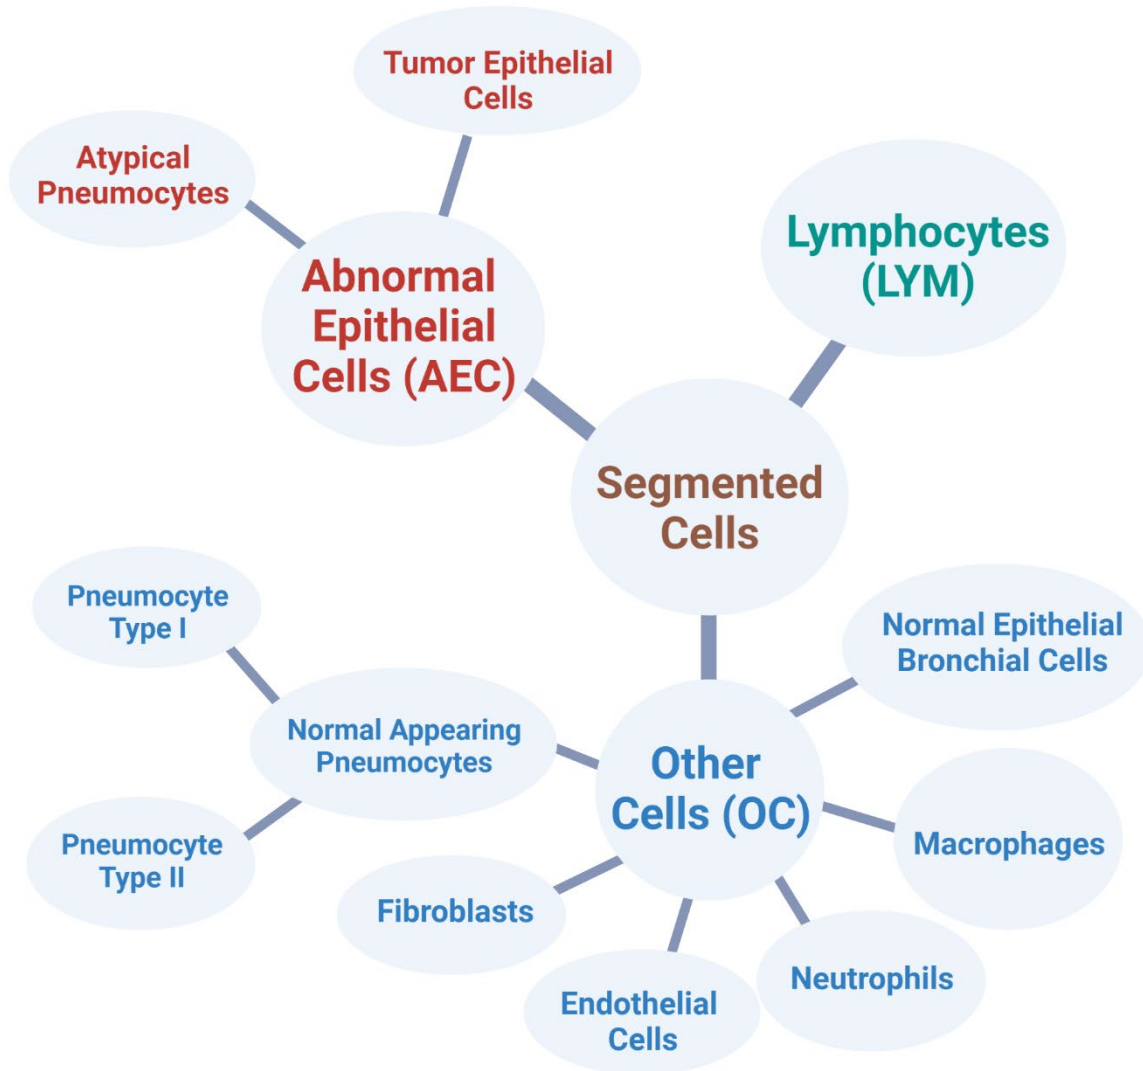

**Supp Figure 3.** A tree-structured taxonomy of cell subtypes. The segmented cells are split into three categories, including abnormal epithelial cell (AEC), lymphocyte (LYM), and other cell (OC).

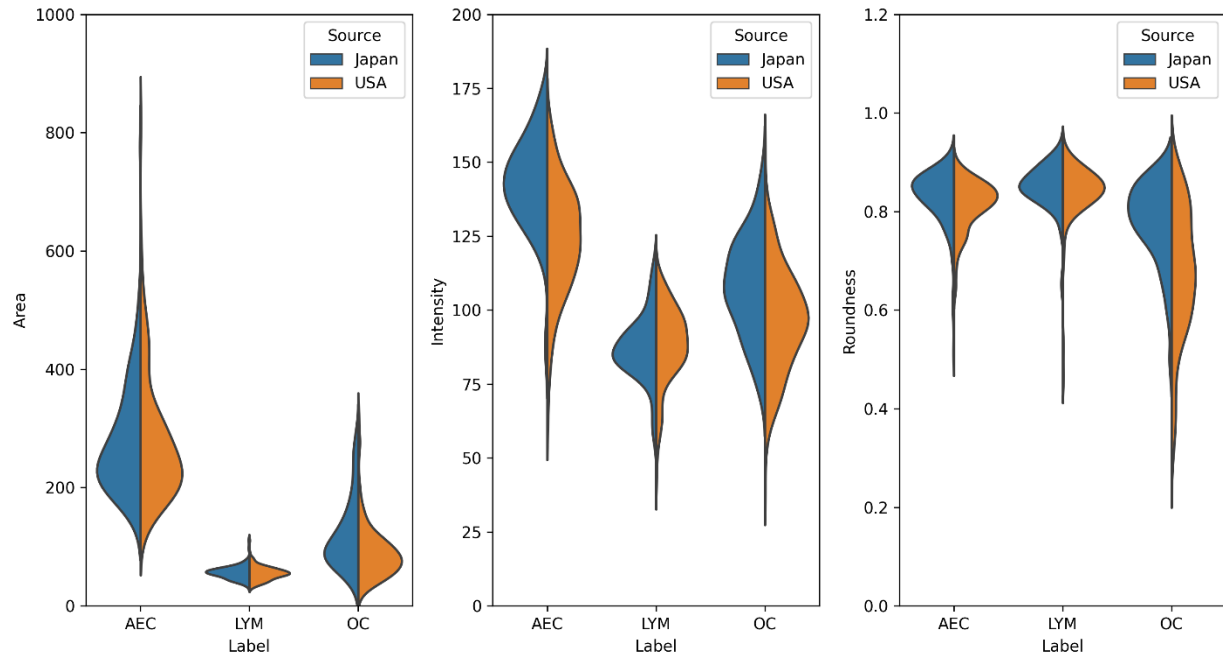

**Supp Figure 4.** Comparison of cellular properties among cell subtypes annotated on two cohorts (Japan and USA). Cellular properties, cell area, mean intensity, and cell roundness are displayed from left to right. The cellular properties between the two datasets are generally consistent. Meanwhile, there are pronounced differences among three cell subtypes on three compared properties.

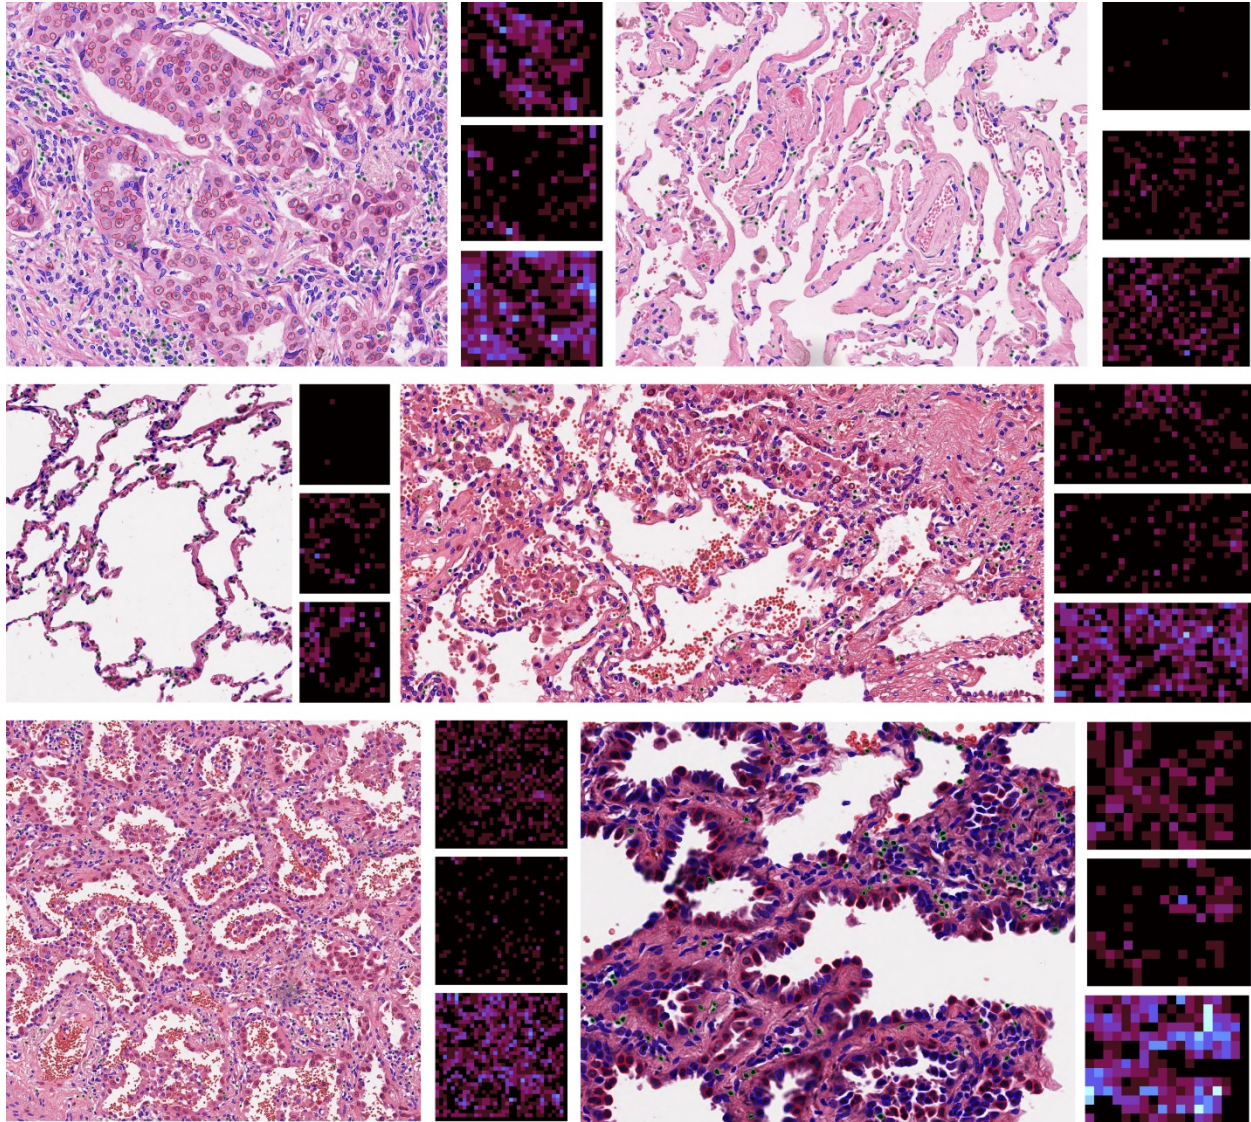

**Supp Figure 5.** Exemplary region of interest (ROI) embedded maps. Cells inside one ROI are classified into three types, and then three embedded maps (AEC-Map, LYM-Map, and OC-Map) are generated accordingly. For every group of four images, the left is the ROI, the top-right is its AEC-Map, the middle right is its LYM-Map, and the bottom right is its OC-Map. The embedded maps are grayscale images and are color-coded via colormap MAGMA.

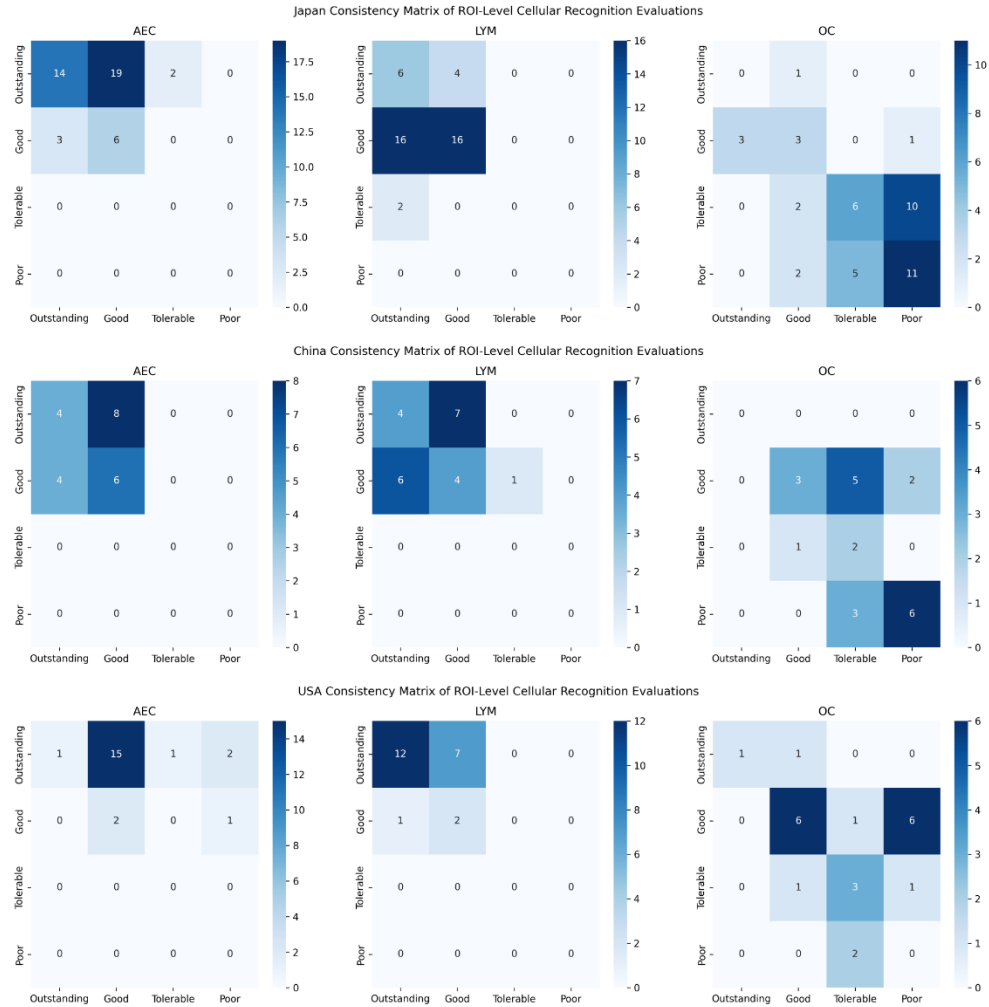

**Supp Figure 6.** The consistency matrices of two pathologists' visual estimation of ROI-level cell recognition precision. From top to bottom, cover the evaluations on ROIs randomly selected from Japan, China, and USA cohorts. From left to right, cover three cell subtypes, including abnormal epithelial cell (AEC), lymphocyte (LYM), and other cell (OC). The majority of inconsistencies occur in neighboring recognition categories. Most AEC and LYM are recognized as "Outstanding" and "Good." In contrast, OC appears more often under the categories of "Good," "Tolerable," and "Poor."
